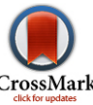

## Correction

# Correction: Allelic Variant in the Anti-Müllerian Hormone Gene Leads to Autosomal and Temperature-Dependent Sex Reversal in a Selected Nile Tilapia Line

The PLOS ONE Staff

Sabrina Pach should be listed in the Acknowledgments rather than the Author Byline. The correct Author Byline is:

Stephan Wessels<sup>1\*</sup>, Reza Ahmad Sharifi<sup>2</sup>, Liane Magdalena Luehmann<sup>1</sup>, Sawichaya Rueangsri<sup>3</sup>, Ina Krause<sup>1</sup>, Gabriele Hoerstgen-Schwark<sup>1</sup>, Christoph Knorr<sup>4</sup>

<sup>1</sup> Department of Animal Sciences - Aquaculture and Water Ecology, Goettingen University, Goettingen, Germany,

<sup>2</sup> Department of Animal Sciences - Animal Breeding and Genetics, Goettingen University, Goettingen, Germany,

<sup>3</sup> Department of Animal and Aquatic Sciences, Faculty of Agriculture, Chiang Mai University, Chiang Mai, Thailand,

<sup>4</sup> Department of Animal Sciences - Livestock Biotechnology and Reproduction, Goettingen University, Goettingen, Germany

\* Email: swessel@gwdg.de

The correct Acknowledgments statement is: We thank Birgit Reinelt for her technical assistance in the recirculation system and help during sampling of fish. We are grateful to E. Schütz for designing the FRET-probes. We thank Sabrina Pach for her technical support during the laboratory work.

Two references are omitted from the third sentence under the subheading “Genotyping of SNP<sub>ss831884014</sub> within *amh*” of the Materials and Methods section. The correct sentence should read: Primers Fret-for and Fret-rev were designed to flank SNP<sub>ss831884014</sub> yielding a fragment of 122 bp length (Schütz et al, 1999, Von Ahsen et al, 1999).

The references are:

Schütz E, von Ahsen N (1999) Spreadsheet software for thermodynamic melting point prediction of oligonucleotide hybridization with and without mismatches. *Biotechniques* 27: 1218–1224.

Von Ahsen N, Oellerich M, Armstrong VW, Schütz E (1999) Application of a thermodynamic nearest-neighbor model to estimate nucleic acid stability and optimize probe design: prediction of melting points of multiple mutations of apolipoprotein B-3500 and factor V with a hybridization probe genotyping assay on the LightCycler. *Clin Chem* 45: 2094–2101.

## Reference

1. Wessels S, Sharifi RA, Luehmann LM, Rueangsri S, Krause I, et al. (2014) Allelic Variant in the Anti-Müllerian Hormone Gene Leads to Autosomal and Temperature-Dependent Sex Reversal in a Selected Nile Tilapia Line. *PLoS ONE* 9(8): e104795. doi:10.1371/journal.pone.0104795

**Citation:** The PLOS ONE Staff (2014) Correction: Allelic Variant in the Anti-Müllerian Hormone Gene Leads to Autosomal and Temperature-Dependent Sex Reversal in a Selected Nile Tilapia Line. *PLoS ONE* 9(11): e114341. doi:10.1371/journal.pone.0114341

**Published:** November 25, 2014

**Copyright:** © 2014 The PLOS ONE Staff. This is an open-access article distributed under the terms of the Creative Commons Attribution License, which permits unrestricted use, distribution, and reproduction in any medium, provided the original author and source are credited.
